# Supplementary material
Source: publisher figshare collection journal article supplement (https://acs.figshare.com/ndownloader/files/3618819)
Supplement: Supplementary file 1 [file 3618819]

Fig. S2

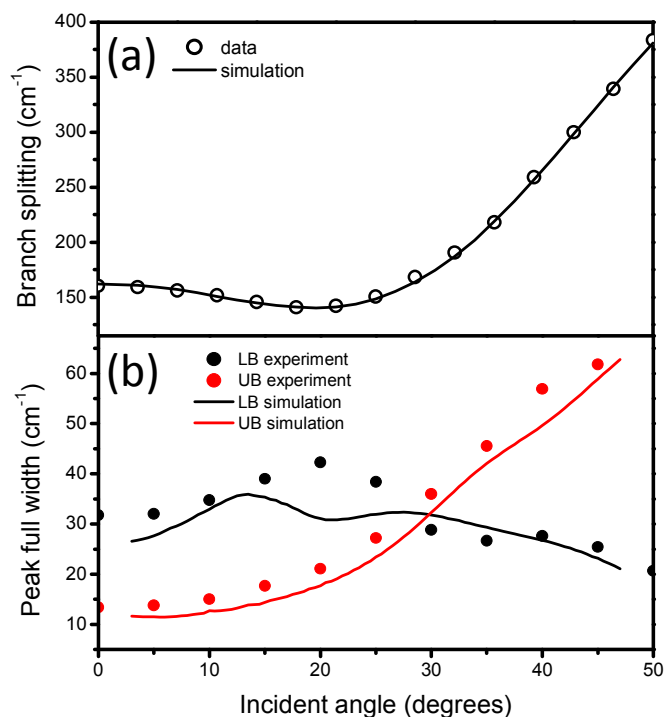

Figure S2. (a) Vertical splitting between upper and lower branches measured in transmission spectra for p-polarized incident radiation as the incident angle is scanned (circles). Simulated results are shown as a black curve. (b) Measured widths of the branches (symbols) compared to transfer-matrix computations (solid curves) that have been broadened to account for the  $6^\circ$  full angular spread of the FTIR beam. These are the p-polarized results complementing the s-polarized results of Figure 3 of the accompanying article.
